# Supplementary material
Source: PubMed Central journal article supplement (PMC4618492)
Supplement: NIHMS727347-supplement-Supplemental.pdf [file NIHMS727347-supplement-Supplemental.pdf]

**Appendix Figure 1. Multivariate-adjusted prediabetes prevalence for U.S. adults aged ≥50 years, by BMI status, NHANES, 1999–2010**

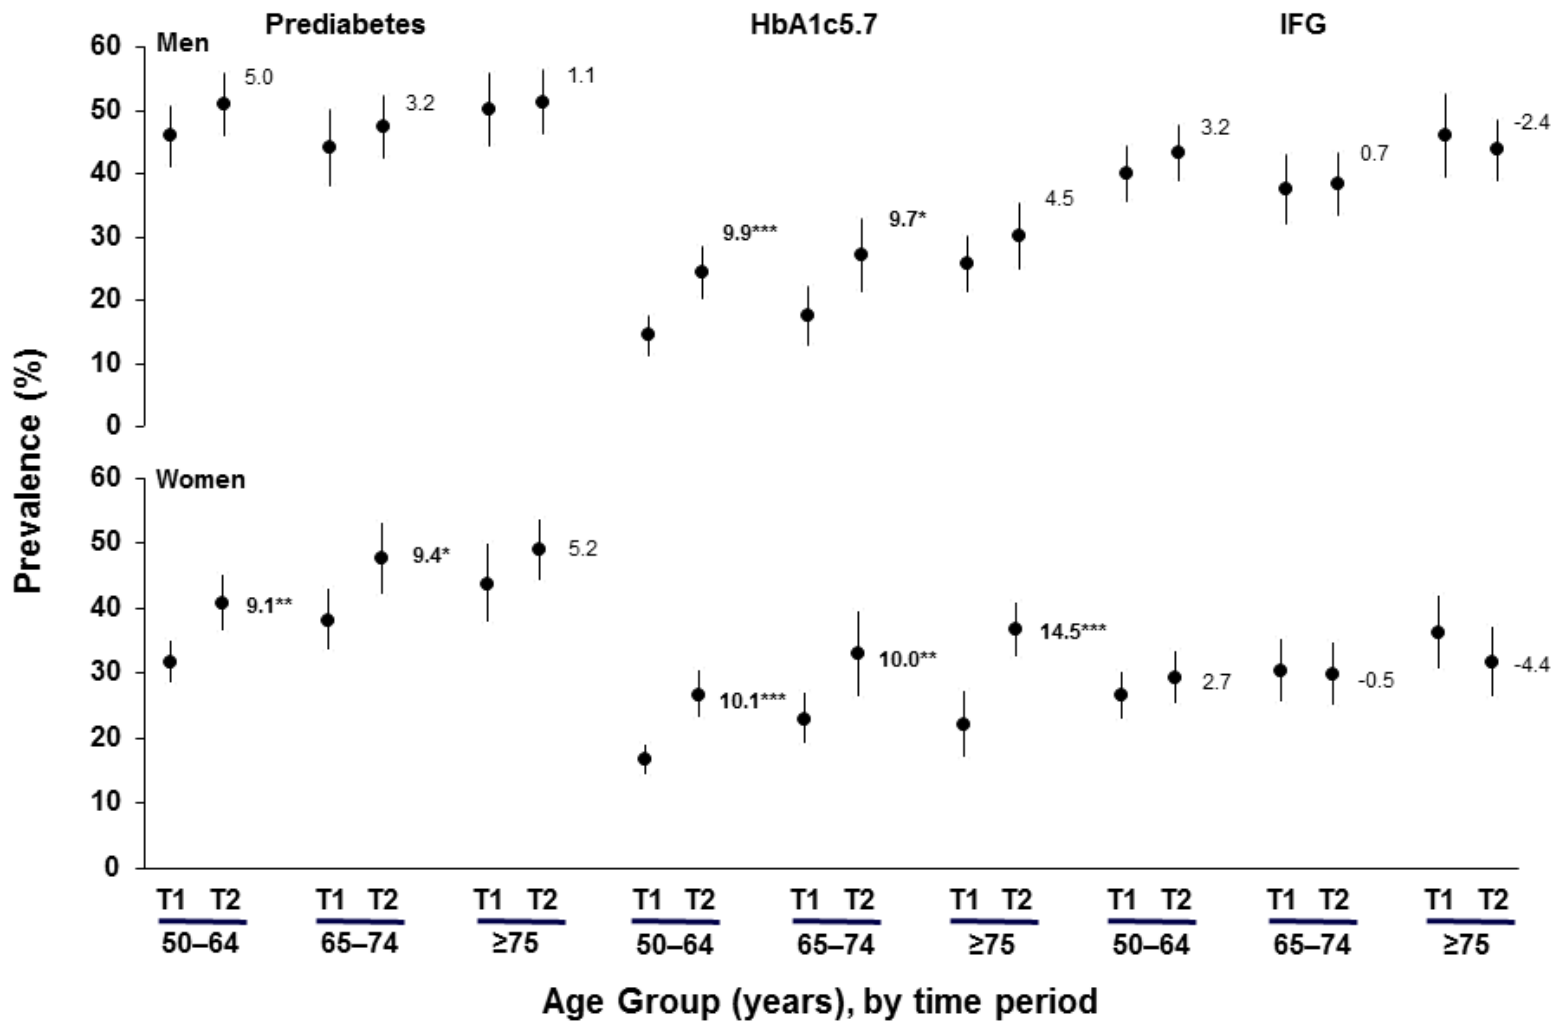

Note: Numbers reflect percentage point changes, e.g. 2006–2010 (T2) minus 1999–2010 (T1). Significant p values (from a *t*-test) are: \* $p < 0.05$ ; \*\* $p < 0.01$ ; \*\*\* $p < 0.001$  (significant point changes are bolded).

**Appendix Table 1.** Multivariate-adjusted<sup>a</sup> prediabetes prevalence for U.S. adults aged ≥50 years, by BMI status, NHANES, 1999–2010

| Prediabetes status<br>by BMI group (kg/m <sup>2</sup> ) | Men                                  |              |           |              |                                  | Women                                |              |           |              |                                  |
|---------------------------------------------------------|--------------------------------------|--------------|-----------|--------------|----------------------------------|--------------------------------------|--------------|-----------|--------------|----------------------------------|
|                                                         | Prevalence (95% CI) by survey period |              |           |              | Absolute<br>prevalence<br>change | Prevalence (95% CI) by survey period |              |           |              | Absolute<br>prevalence<br>change |
|                                                         | 1999–2004                            |              | 2005–2010 |              |                                  | 1999–2004                            |              | 2005–2010 |              |                                  |
| <b>Prediabetes<sup>b</sup></b>                          |                                      |              |           |              |                                  |                                      |              |           |              |                                  |
| Normal (<25)                                            | 40.2                                 | (32.9, 47.5) | 44.1      | (38.1, 50.1) | 3.9                              | 26.3                                 | (22.5, 30.1) | 36.5      | (31.3, 41.7) | <b>10.2**</b>                    |
| Overweight (25–29.9)                                    | 47.4                                 | (42.9, 51.9) | 57.3      | (52.4, 62.2) | <b>9.9**</b>                     | 37.0                                 | (31.8, 42.2) | 48.4      | (43.7, 53.1) | <b>11.4**</b>                    |
| Obese (≥30)                                             | 49.8                                 | (43.7, 55.9) | 46.6      | (41.6, 51.6) | -3.2                             | 42.8                                 | (37.3, 48.3) | 46.9      | (42.6, 51.2) | 4.1                              |
| <b>HbA1c5.7</b>                                         |                                      |              |           |              |                                  |                                      |              |           |              |                                  |
| Normal (<25)                                            | 15.6                                 | (10.5, 20.7) | 23.0      | (17.4, 28.6) | 7.4                              | 11.9                                 | (9.3, 14.5)  | 25.7      | (20.5, 30.9) | <b>13.8***</b>                   |
| Overweight (25–29.9)                                    | 14.0                                 | (11.3, 16.7) | 27.3      | (23.5, 31.1) | <b>13.3***</b>                   | 21.2                                 | (16.8, 25.6) | 34.9      | (30.0, 39.8) | <b>13.7***</b>                   |
| Obese (≥30)                                             | 21.7                                 | (16.6, 26.8) | 26.8      | (21.9, 31.7) | 5.1                              | 24.2                                 | (20.2, 28.2) | 30.3      | (26.9, 33.7) | <b>6.1*</b>                      |
| <b>IFG</b>                                              |                                      |              |           |              |                                  |                                      |              |           |              |                                  |
| Normal (<25)                                            | 33.5                                 | (26.8, 40.2) | 34.7      | (29.7, 39.7) | 1.2                              | 20.4                                 | (16.8, 24.0) | 19.3      | (15.1, 23.5) | -1.1                             |
| Overweight (25–29.9)                                    | 43.4                                 | (38.6, 48.2) | 49.5      | (44.5, 54.5) | 6.1                              | 32.0                                 | (26.8, 37.2) | 32.8      | (27.7, 37.9) | 0.8                              |
| Obese (≥30)                                             | 42.6                                 | (37.2, 48.0) | 39.4      | (34.6, 44.2) | -3.2                             | 35.0                                 | (30.0, 40.0) | 36.6      | (31.0, 42.2) | 1.6                              |

Note: *p*-values were calculated from a *t*-test.

<sup>a</sup> Estimated from a logistic regression model, controlling for age, sex, race/ethnicity, PIR, education, living alone, and BMI. Individuals for other racial/ethnic groups are included in the denominator but their separate estimates are not presented.

<sup>b</sup> Prediabetes is defined by HbA1c5.7 and/or IFG.

\**p*<0.05 (boldface indicates the significant change estimate).

\*\**p*<0.01 (boldface indicates the significant change estimate).

\*\*\**p*<0.001 (boldface indicates the significant change estimate).

HbA1c5.7, hemoglobin A1c 5.7%–6.4% (39–47 mmol/mol); IFG, impaired fasting glucose, fasting plasma glucose=100–125 mg/dL; NHANES, National Health and Nutrition Examination Survey.
